## TITLE PAGE

# Therapeutic Exercise in Temporomandibular Disorders: A Scoping Review protocol

Gabriele Aimini working at Craniomandibular institute , Milano ,Italy

Paolo Mastromarchi - Scuola Universitaria per la Svizzera Italiana, DEASS, Manno, Switzerland; Department of Allied Health Professions, Sheffield Hallam University, Sheffield, UK; IMTA member.

Lorenzo Lo Russo self-employed practitioner, Varese, Italy

Marco Chiodini self-employed practitioner, Magenta, Italy

Roberto Giova Bazzacchi Department of Maxillo-Facial Surgery, Santi Paolo e Carlo Hospital, University of Milan, 20122 Milan, Italy

Noemi Corbetta Department of Neurosciences, Rehabilitation, Ophthalmology, Genetics, Maternal and Child Health, University of Genoa, Campus of Savona, Italy

Federico Amateis Department of Neurosciences, Rehabilitation, Ophthalmology, Genetics, Maternal and Child Health, University of Genoa, Campus of Savona, Italy

Stefano Salvioli Department of Neuroscience, Rehabilitation, Ophthalmology, Genetics and Maternal and Child Sciences (DINOGLMI), University of Genoa, Campus of Savona, Italy

**Corresponding Author** : Gabriele Aimini

Office: Craniomandibular institute viale Gorizia 14 20144 Milano

Mail: [Gabriele.aimini@hotmail.it](mailto:Gabriele.aimini@hotmail.it)

Cell: +393200552556

## Declarations

Ethics approval and consent to participate. Not applicable.

Consent for publication. Not applicable.

Availability of data and materials. Not applicable.

NOTE: This preprint reports new research that has not been certified by peer review and should not be used to guide clinical practice.  
Competing interests. The authors declare that they have no competing interests.

Funding. None to declared.

Authors' contributions. The work was originally conceived by Gabriele, with the other authors responsible for the execution of the various sections. Stefano and Paolo provided methodological support for the design and execution of the study, and all authors approved the manuscript.

Acknowledgements. Not applicable.

## **Abstract**

Temporomandibular Disorders (TMDs) are musculoskeletal dysfunctions affecting the temporomandibular joint and masticatory muscles, causing pain and functional limitations. The etiology of TMDs is multifactorial, including biological factors, parafunctional habits (such as bruxism), and psychological conditions. This study aims to map and synthesize existing evidence on therapeutic exercise for TMDs.

**Inclusion criteria:** All primary studies, randomized controlled trials (RCTs), prospective and retrospective observational studies, case studies will be considered.

**Methods:** This scoping review will be performed in accordance with the Joanna Briggs Institute (JBI) methodology. MEDLINE, Cochrane Central, Scopus, CINAHL Complete, Embase, PEDro and will be searched from inception until now. Additional records will be identified through searching in Google Scholar (the first 5 pages were examined) and Open Grey, , clinicaltrials.gov, Trialsearch.who.int and the reference lists of all relevant studies. No study design, publication type, or data restrictions will be applied. Two reviewers will independently screen all abstracts and full-text studies for inclusion. A data collection form will be developed by the research team to extract the characteristics of the studies included. A tabular and accompanying narrative summary of the information will be provided.

**Conclusion:** This will be the first scoping review to provide a comprehensive overview and the results will add significant information for clinicians in the management of TMDs with therapeutic exercise. In addition, any gaps in knowledge on the topic will be identified. The results of this research will be published in a peer-reviewed journal and will be presented at relevant (inter)national scientific events.

**Keywords:** temporomandibular joint dysfunction, mandibular disease, physical exercise, active movement, exercise training

## Introduction

Temporomandibular disorders (TMDs) are a series of musculoskeletal dysfunctions affecting the temporomandibular joint or the masticatory muscles and/or related structures (1,2).

TMDs can be characterized by pain in the mandibular, oral, facial, and periauricular areas, limitations of passive or active mouth opening, and joint sounds (3,4); pain can also spread to several neighbouring structures and generate other symptoms such as tinnitus, otalgia, headache, and cervicalgia (5,6,7).

TMDs are the main cause of pain of the orofacial and head region, after those of dental and periodontal origin (8). A recent study by Valesan (2020) reported that TMDs affect 5-12% of the adult population and 11% of children and adolescents, TMDs were considered the most common cause of chronic pain of non-dental origin in the orofacial area. In both age groups, the most frequent dysfunction was disc dislocation, followed by degenerative joint pathology (9).

Furthermore, TMDs are more frequent in the female population, with women having twice the risk of developing them than men. Interestingly, this prevalence in the female gender in a ratio of 2:1 can be found in all diagnostic groups identified according to the research diagnostic criteria for temporomandibular disorders (RDC/TMDs) Axis I, more specifically 2.09:1 in the muscle disorders group, 1.6:1 in the disc displacement group and 2.08:1 in the arthralgia/arthritis/arthrosis group (10).

There seems to be a direct correlation between the most severe cases of TMDs and a lower quality of life in terms of altered taste, discomfort during eating, voice changes, chronic pain resulting in absence from work, loss of energy, insomnia, restriction of physical activity, emotional disturbances, anxiety, stress, depression, reduced economic income due to extended need for medical services, and predictable social repercussions (11).

The etiology of TMDs is multifactorial varying from physical predisposition factors to para-functional habits such as cheek, lip or tooth biting (bruxism), from comorbidity with other neck or head disorders to psychological factors (12, 14 - 17).

Due to the complexity and heterogeneity of clinical presentations, there is no unique method in treating these patients; the literature suggests multimodal physiotherapy treatments combining therapeutic exercise, education, manual therapy, cognitive behavioural therapies, laser therapy, and dry needling (4,18,20,21).

Idáñez-Robles et al. (2023) in a recent systematic review with meta-analysis investigated the variability of treatment proposals for patients with TMDs evaluating the available evidence on the effectiveness of physiotherapy in improving pain and passive and active opening of the mouth (22).

Also, Arribas-Pascual et al. addressed this topic with an umbrella and systematic mapping review with meta-analysis. They concluded that manual therapy, therapeutic exercise, and

low-level laser therapy effectively reduced pain intensity and improved maximal mouth opening in TMDs (23).

Despite the existence of substantial evidence supporting the efficacy of physiotherapy interventions for TMDs, there is an absence of guidelines delineating the dosage and type of exercise to be administered in daily clinical settings. Instead, there is considerable heterogeneity in the intervention content, encompassing a wide spectrum of approaches, from general exercises involving the entire body, grounded in postural correction, to targeted exercises for the temporomandibular joint, masticatory muscles, or the cervical spine.

Therefore, this scoping review aims to map the available studies on therapeutic exercise for TMDs in terms of the type of exercise proposed and its characteristics: intensity, dosage, frequency, and mode of administration.

### **Research objective (s)**

1. A compendium of therapeutic exercises for TMDs will be compiled. The compendium will encompass active movements, resistance control exercises, stretching, posture and muscle strengthening exercises, and other types of active exercises.
2. The characteristics of the proposed exercises for TMDs will be investigated, including the mode of administration, intensity, dosage, facilitation, posology, direction of movement, progressions, and outcome measures.
3. The study will examine the types and characteristics of exercise most frequently used within TMDs subgroups, including active mouth opening movements, lateral movements, protrusion movements, and motor control exercises.
4. The secondary objective is to map by year of publication, study design, geographical distribution of TMDs, classification and terminology used to define TMDs.

### **Inclusion criteria**

Studies will be eligible for inclusion if they meet the Population, Concept, and Context (PCC) criteria:

*Population:* studies with adult participants (from 18 years), diagnosed by any type of health professional (e.g. doctor, dentist, physiotherapist...), with any type of TMDs.

*Concept:* All types of exercise (e.g., exercise with or without supervision, active exercise, passive-active exercise, postural exercise for TMDs, jaw exercise for TMD, neck exercise for TMDs, shoulder exercise for TMDs, holistic approach for TMD).

*Context:* All contexts in which exercise is administered, such as 1:1 delivery, group, outpatient, home, self-administered, delivered by any clinician.

*Sources:* all primary studies, randomized controlled trials (RCTs), prospective and retrospective observational studies, and case studies will be considered.

Language: English, Italian, French, Spanish.

### **Exclusion criteria**

*Population:* Studies of persons with fractures, genetic abnormalities, post-operative conditions, infections, and tumour conditions affecting the TMJ will be excluded, well as studies in asymptomatic subjects.

Studies that do not meet the specific inclusion PCC criteria will be excluded. Systematic reviews, conference abstracts, narrative reviews and non-peer-reviewed studies will be excluded.

### **Methods**

The proposed scoping review will be conducted following the JBI methodology for scoping reviews (24). It will be reported according to the PRISMA-ScR (25).

### **Search strategy**

An initial limited search of MEDLINE will be undertaken to identify articles on the topic and then index terms used to describe the articles will be used to develop a full search strategy for MEDLINE (see Table 1, which displays the search strategy for MEDLINE database). The search strategy, including all identified keywords and index terms, will be adapted for use in Cochrane Central, Scopus, CINAHL Complete, Embase, Pedro.

In addition, Google Scholar (the first 5 pages were examined), Open Grey, clinicaltrials.gov, trialsearch.who.int the reference lists of all relevant studies will be searched.

### **Study selection**

Once the search strategy is completed, search results will be collated and imported to online the software Rayyan ([rayyan.qcri.org](http://rayyan.qcri.org)) (26). Duplicates will be removed using Rayyan. The review process will consist of two levels of screening: (1) a title and abstract screening and (2) a full-text screening. All labels for the studies excluded through the criteria defined by the PCC will be saved on Rayyan itself. For both levels, two authors (GA, and LLR) will independently screen the articles, and a third author (FA) will resolve any emerging conflicts.

The reasons for the exclusion of any full-text paper will be recorded and reported in a scoping review appendix. The results of the search will be reported in full in the final scoping review

and presented with a Preferred Reporting Items for Systematic Reviews and Meta-analyses (PRISMA) flow diagram (27).

### **Data extraction**

Key data and information from selected articles will be collected including authors, country, year of publication, type of publication, type of TMDs, outcome measures, type of exercise and posology.

This form will be reviewed by the research team and pre-tested by all reviewers before implementation to ensure that the form can most accurately accommodate all the data that will be extracted. The presentation of results is usually an iterative process during scoping reviews; additional data may be added to this module based on subgroups that may emerge from the analysis of the included studies (28,29).

### **Data synthesis**

The results of the research will be presented in three ways:

1. The process will use numerical framing to select relevant studies, with a detailed and mapped description to ensure reproducibility. The extracted data will be summarised in tables and graphs. Outcome mapping will follow an iterative approach, with additional categories added as necessary (29).
2. The framing of the themes will be used to produce a thematic synthesis. This will be related to the key concepts and themes relevant to the research questions and according to the subgroups (e.g. different TMD exercises, dosage, type of treatment) and others that may emerge.
3. The use of visual framing, which includes the design of contemporary and comprehensible graphics will be used to facilitate the synthesis of the extracted results, thereby enabling the reader to engage in critical analysis.

### **List of abbreviations**

JBI: Joanna Briggs Institute; PCC: Population-concept context; TMDs: Temporo-mandibular disorders; PRISMA: Preferred Reporting Items for Systematic Reviews and Meta-analyses; PRISMA-ScR: The Preferred Reporting Items for Systematic reviews and Metanalyses extension for Scoping Reviews; RCTs: randomized controlled trials, RDC/TMDs: research diagnostic criteria for temporomandibular disorders

## Reference

1. Marim GC, Machado BCZ, Trawitzki LVV, de Felício CM. Tongue strength, masticatory and swallowing dysfunction in patients with chronic temporomandibular disorder. *Physiol Behav.* 2019;210.
2. Dubner R, Ohrbach R, Dworkin SF. The Evolution of TMD Diagnosis: : Past, Present, Future. In: *Journal of Dental Research.* 2016.
3. Fernandez-de-las-Penas C, Svensson P. Myofascial Temporomandibular Disorder. *Curr Rheumatol Rev.* 2015;12(1).
4. List T, Jensen RH. Temporomandibular disorders: Old ideas and new concepts. Vol. 37, *Cephalalgia.* 2017.
5. Magalhães BG, Freitas JL de M, Barbosa AC da S, Gueiros MCSN, Gomes SGF, Rosenblatt A, et al. Temporomandibular disorder: otologic implications and its relationship to sleep bruxism. *Braz J Otorhinolaryngol.* 2018;84(5).
6. Ibáñez-Vera AJ, Alonso-Royo R, Sánchez-Torrelo CM, Zagalaz-Anula N, López-Collantes J, Lomas-Vega R. Psychometric evaluation of the krogh-poulsen test for the diagnosis of the temporomandibular disorders. *Diagnostics.* 2021;11(10).
7. Yekkalam N, Wänman A. Association between signs of hyperalgesia and reported frequent pain in jaw-face and head. *Acta Odontol Scand.* 2021;79(3):188–93.
8. Okeson JP, de Leeuw R. Differential Diagnosis of Temporomandibular Disorders and Other Orofacial Pain Disorders. Vol. 55, *Dental Clinics of North America.* 2011.
9. Valesan LF, Da-Cas CD, Réus JC, Denardin ACS, Garanhani RR, Bonotto D, et al. Prevalence of temporomandibular joint disorders: a systematic review and meta-analysis. Vol. 25, *Clinical Oral Investigations.* Springer Science and Business Media Deutschland GmbH; 2021. p. 441–53.
10. Bueno CH, Pereira DD, Pattussi MP, Grossi PK, Grossi ML. Gender differences in temporomandibular disorders in adult populational studies: A systematic review and meta-analysis. Vol. 45, *Journal of Oral Rehabilitation.* Blackwell Publishing Ltd; 2018. p. 720–9.
11. Bitiniene D, Zamaliauskiene R, Kubilius R, Leketas M, Gailius T, Smirnovaite K. Quality of life in patients with temporomandibular disorders. A systematic review. Vol. 20, *Stomatologija.* 2018.
12. Kapos FP, Exposto FG, Oyarzo JF, Durham J. Temporomandibular disorders: a review of current concepts in aetiology, diagnosis and management. Vol. 13, *Oral Surgery.* 2020.
13. Progiante P, Pattussi M, Lawrence H, Goya S, Grossi P, Grossi M. Prevalence of Temporomandibular Disorders in an Adult Brazilian Community Population Using the Research Diagnostic Criteria (Axes I and II) for Temporomandibular Disorders (The Maringá Study). *Int J Prosthodont.* 2015;28(6).

14. Harper DE, Sayre K, Schrepf A, Clauw DJ, Aronovich S. Impact of Fibromyalgia Phenotype in Temporomandibular Disorders. *Pain Medicine (United States)*. 2021;22(9).
15. Lobbezoo F, Naeije M. Bruxism is mainly regulated centrally, not peripherally. Vol. 28, *Journal of Oral Rehabilitation*. 2001.
16. Saghafi E, Tuomi L, Kjeller G. The prevalence and symptoms of temporomandibular disorders in head and neck cancer patients. *Acta Odontol Scand*. 2022;80(4).
17. Al-Khotani A, Meisha DE, Al Sayegh S, Hedenberg-Magnusson B, Ernberg M, Christidis N. The Association Between Psychological Symptoms and Self-Reported Temporomandibular Disorders Pain Symptoms in Children and Adolescents. *Frontiers in Oral Health*. 2021;2.
18. Gil-Martínez A, Paris-Aleman A, López-de-Uralde-Villanueva I, La Touche R. Management of pain in patients with temporomandibular disorder (TMD): Challenges and solutions. Vol. 11, *Journal of Pain Research*. 2018.
19. Furquim BD, Flamengui LMSP, Conti PCR. TMD and chronic pain: A current view. *Dental Press J Orthod*. 2015;20(1).
20. Ferrillo M, Nucci L, Giudice A, Calafiore D, Marotta N, Minervini G, et al. Efficacy of conservative approaches on pain relief in patients with temporomandibular joint disorders: a systematic review with network meta-analysis. *Cranio - Journal of Craniomandibular and Sleep Practice*. 2022;
21. Liu F, Steinkeler A. Epidemiology, diagnosis, and treatment of temporomandibular disorders. Vol. 57, *Dental Clinics of North America*. 2013.
22. Idáñez-Robles AM, Obrero-Gaitán E, Lomas-Vega R, Osuna-Pérez MC, Cortés-Pérez I, Zagalaz-Anula N. Exercise therapy improves pain and mouth opening in temporomandibular disorders: A systematic review with meta-analysis. *Clin Rehabil*. 2023;37(4).
23. Arribas-Pascual M, Hernández-Hernández S, Jiménez-Arranz C, Grande-Alonso M, Angulo-Díaz-Parreño S, La Touche R, et al. Effects of Physiotherapy on Pain and Mouth Opening in Temporomandibular Disorders: An Umbrella and Mapping Systematic Review with Meta-Meta-Analysis. Vol. 12, *Journal of Clinical Medicine*. 2023.
24. The Joanna Briggs Institute Reviewers' Manual 2015: Methodology for JBI Scoping Reviews Adelaide, Australia: Joanna Briggs Institute; 2015 [Available from: [http://joannabriggs.org/assets/docs/sumari/Reviewers-Manual\\_Methodology-for-JBI-Scoping-169\\_Reviews\\_2015\\_v2.pdf](http://joannabriggs.org/assets/docs/sumari/Reviewers-Manual_Methodology-for-JBI-Scoping-169_Reviews_2015_v2.pdf) accessed 16th November 2019.
25. Tricco, AC, Lillie, E, Zarin, W, O'Brien, KK, Colquhoun, H, Levac, D, Moher, D, Peters, MD, Horsley, T, Weeks, L, Hempel, S et al. PRISMA extension for scoping reviews (PRISMA-ScR): checklist and explanation. *Ann Intern Med*. 2018,169(7):467-473. doi: 10.7326/M18-0850
26. Ouzzani M, Hammady H, Fedorowicz Z, Elmagarmid A. Rayyan-a web and mobile app for systematic reviews. *Syst Rev*. 2016;5(1):210. doi:10.1186/s13643-016-0384-4



27. Page MJ, McKenzie JE, Bossuyt PM, et al. The PRISMA 2020 statement: an updated guideline for reporting systematic reviews. *BMJ*. 2021;372:n71. Published 2021 Mar 29. doi:10.1136/bmj.n71

28. Pollock D, Tricco AC, Peters MDJ, Mclnerney PA, Khalil H, Godfrey CM, Alexander LA, Munn Z. Methodological quality, guidance, and tools in scoping reviews: a scoping review protocol. *JBI Evid Synth*. 2022 Apr 1;20(4):1098-1105. doi: 10.11124/JBIES-20-00570.

29. Peterson J, Pearce PF, Ferguson LA, Langford CA. Understanding scoping reviews: Definition, purpose, and process. *J Am Assoc Nurse Pract*. 2017 Jan;29(1):12-16. doi: 10.1002/2327-6924.12380.

## Appendix 1

((((((((((Temporomandibular Joint[MeSH Terms]) OR (Temporomandibular Joint[Text Word])) OR (Temporomandibular Joint Dysfunction Syndrome[MeSH Terms])) OR (Temporomandibular Joint Dysfunction Syndrome[Text Word])) OR (Craniomandibular Disorders[MeSH Terms])) OR (Craniomandibular Disorders[Text Word])) OR (Mandibular Diseases[MeSH Terms])) OR (Mandibular Diseases[Text Word])) OR (Jaw Diseases[MeSH Terms])) OR (Jaw Diseases[Text Word])) AND (((((((((((Exercise[MeSH Terms]) OR (Exercise[Text Word])) OR (Motor Activity[MeSH Terms])) OR (Motor Activity[Text Word])) OR (Physical Exercise[MeSH Terms])) OR (Physical Exercise[Text Word])) OR (Exercise Training[MeSH Terms])) OR (Exercise Training[Text Word])) OR (Muscle Stretching Exercises[MeSH Terms])) OR (Muscle Stretching Exercises[Text Word])) OR (active movement[MeSH Terms])) OR (active movement[Text Word])) OR (joint mobilization[Text Word])) OR (Rehabilitation[MeSH Terms])) OR (Rehabilitation[Text Word])) OR (Physical Therapy Modalities[MeSH Terms])) OR (Physical Therapy Modalities[Text Word]))
